# Supplementary material
Source: publisher site journal article supplement (https://www.dovepress.com/article/375983)
Supplement: Supplementary file 1 [file get_supplementary_file.php]

# Appendix A – Patient Survey

All staff survey items are presented below, grouped by category. The percentage of respondents endorsing “always” or “often” during the three survey periods is presented for each item.

|  | **Percent of Respondents in Agreement*** | | | ***P-Value***** |
| --- | --- | --- | --- | --- |
| *Baseline*  *(n=721)* | *End Year 1 (n=632)* | *End Year 2 (n=389)* |

**Satisfaction with Health Center**

| I am satisfied with my experience at the health center. | 91.2 | 91.2 | 91.7 | 0.489 |
| --- | --- | --- | --- | --- |
| I can get an appointment for care at the health center when I need it. | 83.2 | 88.5 | 86.5 | 0.330 |

**Satisfaction with Staff and Visit Experience**

| My health care providers take time to understand my health concerns. | 93.3 | 94.4 | 93.8 | 0.477 |
| --- | --- | --- | --- | --- |
| The health center staff includes my opinion when making decisions about my care. | 92.7 | 93.2 | 91.2 | 0.193 |
| I receive a document (paper or electronic) which includes information about the decisions made at each visit. | 87.1 | 88.8 | 89.2 | 0.548 |
| When my provider refers me to a specialist outside the health center, I receive the support I need to see the specialist. | 89.5 | 93.2 | 91.5 | 0.330 |
| Before today's visit, health center staff asked me to complete tests that screen for cancer. | 30.5 | 33.3 | 48.7 | <0.001 |

**Utilization of Services**

| I use the health center’s online patient portal. | 21.9 | 16.9 | 15.1 | <0.001 |
| --- | --- | --- | --- | --- |

| I would like to receive text messages reminding me of the need for health screenings. | 57.7 | 56.8 | 56.1 | 0.154 |
| --- | --- | --- | --- | --- |

*Endorsed either “Always” or “Often.”

**Kruskal-Wallis test.

# Appendix B – Staff Survey

All staff survey items are presented below, grouped by category. The percentage of respondents endorsing “strongly agree” or “somewhat agree” during the three survey periods is presented for each item.

|  | **Percent of Respondents in Agreement*** | | | ***P-Value***** |
| --- | --- | --- | --- | --- |
| *Baseline*  *(n=128)* | *End Year 1 (n=139)* | *End Year 2 (n=107)* |

**Individual Level Satisfaction and Experience**

| I feel I am an important contributing member of my health care team. | 86.5 | 89.7 | 87.2 | 0.190 |
| --- | --- | --- | --- | --- |
| My work adds value to my health center's ability to provide care. | 93.6 | 93.2 | 93.6 | 1.00 |
| My job allows me to fully use my skills and abilities. | 81.3 | 87.0 | 84.4 | 0.373 |
| There are opportunities for career advancement within my health center. | 60.5 | 58.9 | 66.1 | 0.949 |
| I look forward to coming to work each day. | 83.3 | 81.5 | 80.7 | 1.000 |
| Overall, I am satisfied with my job. | 86.5 | 85.6 | 82.6 | 0.549 |

**Organizational Level and Experience**

| If I have ideas about how to improve systems or processes, I feel others will listen to me. | 67.7 | 70.5 | 64.2 | 0.256 |
| --- | --- | --- | --- | --- |
| I have been provided sufficient training to help me fulfill my specific role(s) as a member of my larger health center team. | 77.3 | 82.2 | 74.3 | 0.075 |
| At my health center, we all work together and support one another in getting work done. | 76.9 | 78.8 | 79.8 | 0.561 |
| Overall, I am satisfied with my health center's ability to add value to the community. | 94.4 | 92.5 | 92.6 | 0.732 |

**Administrative Procedures**

| My health center has processes or protocols in place to support opportunities for patients to share in decision-making. | 66.1 | 72.6 | 71.6 | 1.00 |
| --- | --- | --- | --- | --- |
| My health center has processes or protocols in place to support cancer screening for every patient, regardless of ability to pay. | 81.3 | 87.0 | 88.1 | 0.762 |

| At my health center, cancer screening is the responsibility of the entire care team and not just the medical providers. | 76.5 | 82.1 | 80.7 | 0.235 |
| --- | --- | --- | --- | --- |
| At my health center, screening and management of chronic disease (depression, obesity, high blood pressure, diabetes) are the responsibility of the entire care team and not just the medical providers. | 83.3 | 88.4 | 86.1 | 1.00 |
| My health center's leadership regularly communicates the need to transform how we deliver care in order to improve health outcomes. | 80.5 | 87.7 | 81.5 | 0.401 |
| My health center's leadership regularly communicates the need to transform how we deliver care in order to improve patient experience. | 79.7 | 82.9 | 82.4 | 0.614 |
| My health center's leadership regularly communicates the need to transform how we deliver care in order to improve provider experience. | 66.1 | 76.0 | 73.1 | 0.609 |
| My health center's leadership regularly communicates the need to transform how we deliver care in order to reduce costs. | 71.7 | 78.1 | 79.6 | 0.811 |

*Endorsed either “Strongly agree” or “Somewhat agree.”

**Kruskal-Wallis test.
